# Supplementary material for: Synergy of Mutation-Induced Effects in Human Vitamin K Epoxide Reductase: Perspectives and Challenges for Allo-Network Modulator Design
Source: MDPI journal article supplement (doi:10.3390/ijms25042043), 2024-02-07
Supplement: s1 [file s1]

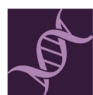

# Synergy of Mutation-Induced Effects in Human Vitamin K Epoxide Reductase: Perspectives and Challenges for Allo-Network Modulator Design

Marina Botnari and Luba Tchertanov \*

## Supplementary Materials

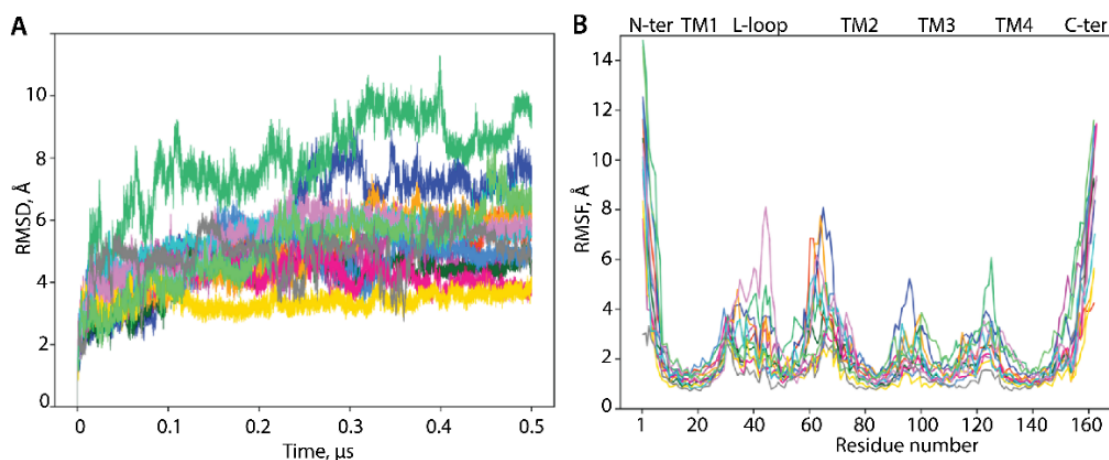

**Figure S1.** Characterisation of the MD simulations for the four hVKORC1 mutants compared to the native enzyme. **(A)** RMSDs from the initial coordinates computed for all C $\alpha$ -atoms (right) in each protein after fitting to initial conformation. **(B)** RMSFs computed for the C $\alpha$ -atoms for the MD conformation of each protein after fitting to the initial conformation (reference structure at t=0). Mutated proteins are distinguished by colour (1/2/3 replicas): VKOR<sup>A41S</sup>(R) (orange red/orange/gold), VKOR<sup>H68Y</sup>(R) (dark blue/blue/turquoise), VKOR<sup>S52W</sup> (D) (fuchsia/pink/violet) and VKOR<sup>W59R</sup> (D) (dark green/sea green/lime); VKOR<sup>WT</sup>(grey).

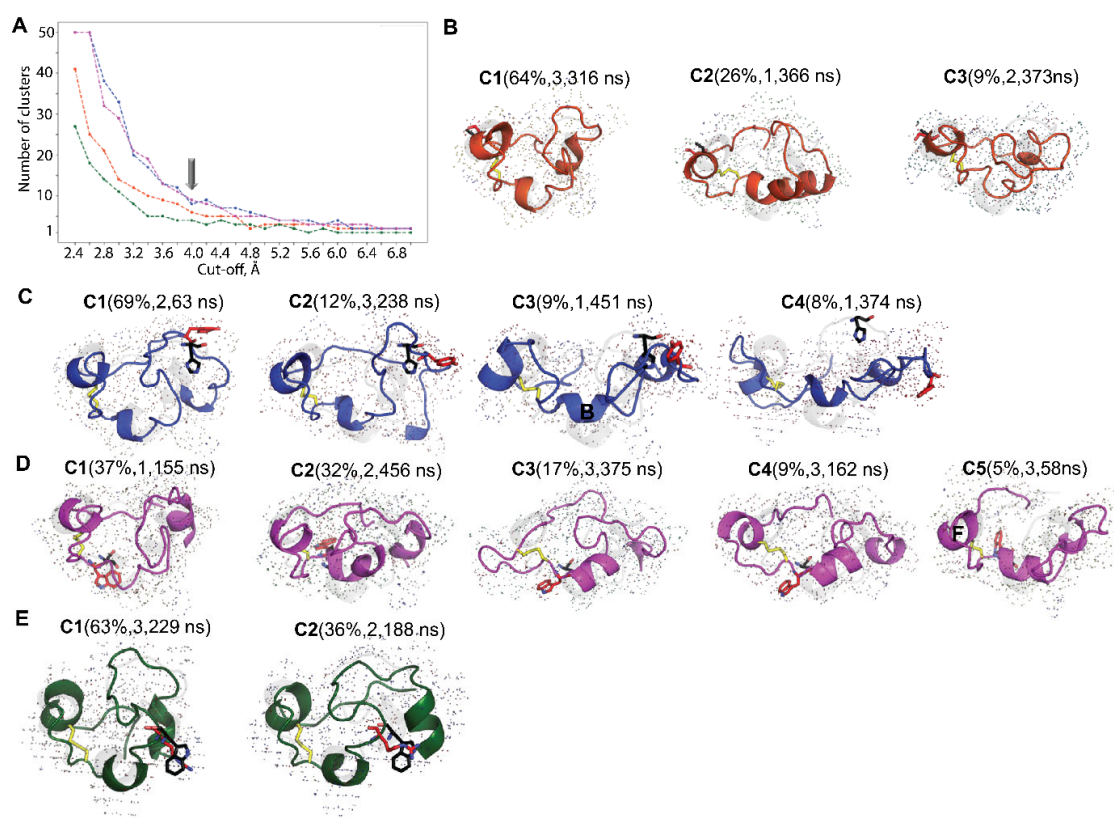

**Figure S2.** Ensemble-based clustering of MD conformations of the L-loop from hVKORC1 mutants. **(A)** Number of clusters obtained for each mutant using concatenated trajectories. Clustering was performed on each 10-ps frame of every trajectory using cut-off values that varied from 2.4 to 7.0 Å, with a step of 0.4 Å. The cut-off value of 4.0 Å was estimated as the optimal. **(B–E)** Representative conformations of the L-loop from clusters **(C)** with population  $\geq 5\%$ . The population of each cluster is given in brackets (in %), together with the replica number (in bold) and the time (in ns) over which the representative conformation was recorded. Mutated proteins are distinguished by colour: hVKORC1<sup>A41S</sup> (orange red), hVKORC1<sup>H68Y</sup> (dark blue), hVKORC1<sup>S52W</sup> (fuchsia), and hVKORC1<sup>W59R</sup> (dark green); hVKORC1<sup>WT</sup> (gray). The L-loop of mutants is shown as coloured ribbons superposed with the L-loop of hVKORC1<sup>WT</sup> presented in grey cartoon with a meshed surface. Disulphide bridges C43–C51 are drawn as yellow sticks, and the mutated and native residues are shown as red and black sticks respectively.

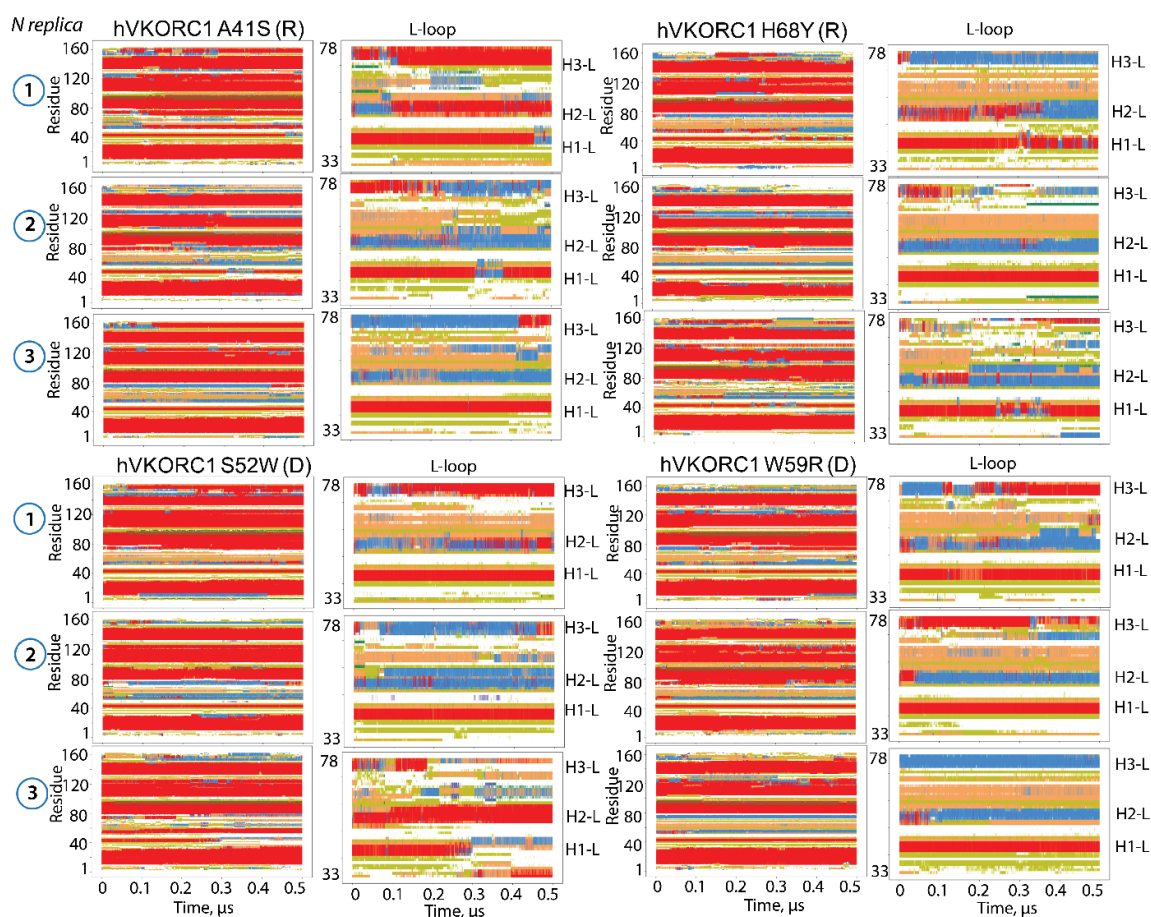

**Figure S3.** Folding of L-loop from hVKORC1 mutants in the inactive state. The time-dependent evolution of the secondary structure of each residue, as assigned by the Define Secondary Structure of Proteins (DSSP) method:  $\alpha$ -helix is in red,  $3^{10}$ -helix is in blue, turn is in orange, and bend is in dark yellow is shown for the full-length proteins (1<sup>st</sup> and 3<sup>rd</sup> columns) and L-loop (2<sup>nd</sup> and 4<sup>th</sup> columns). L-loop helices (H1-L, H2-L, H3-L) are denoted. The index of replica (1-3) is encircled.

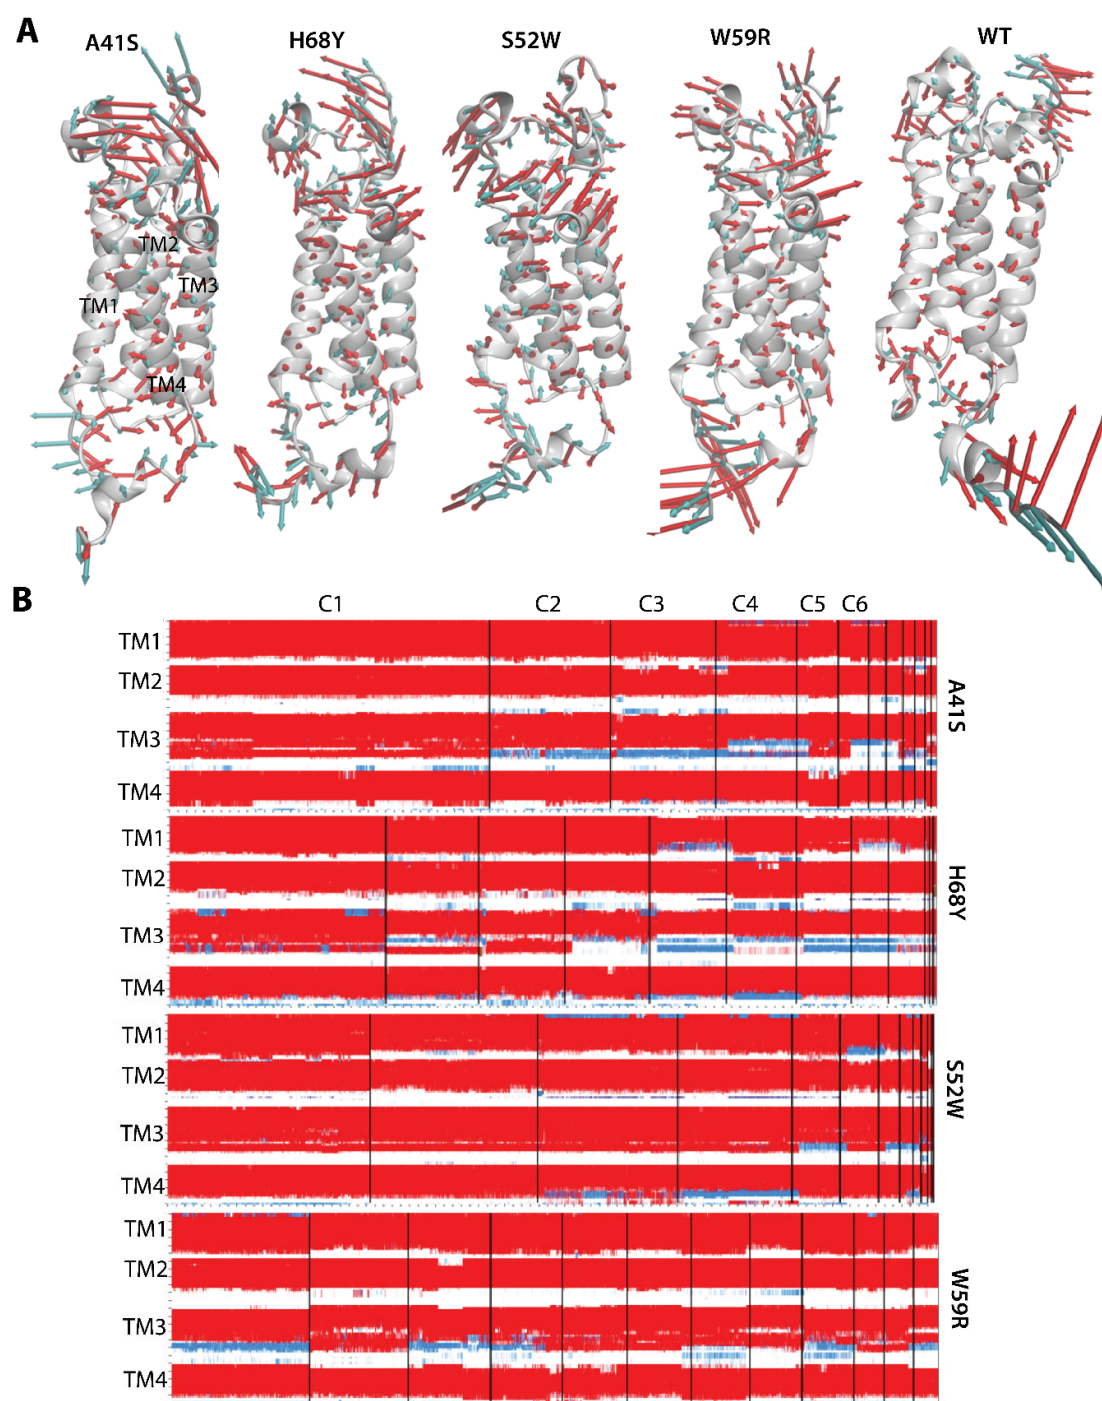

**Figure S4.** Principal Component Analysis (PCA) of hVKORC1. **(A)** PCA modes calculated for the concatenated MD trajectory of each hVKORC1 full-length mutant (1-163 residues) after least-square fitting of the MD conformations to the average conformation. Atomic components in the first PCA modes are drawn as red (1<sup>st</sup> mode) and blue (2<sup>nd</sup> mode) arrows projected onto the respective average structure shown as cartoon. Only motion with an amplitude  $\geq 4$  Å is considered. **(B)** Clustering of the TMD conformations using their secondary structure content. The  $\alpha$ - and  $3^{10}$ -helices are in red and blue respectively.



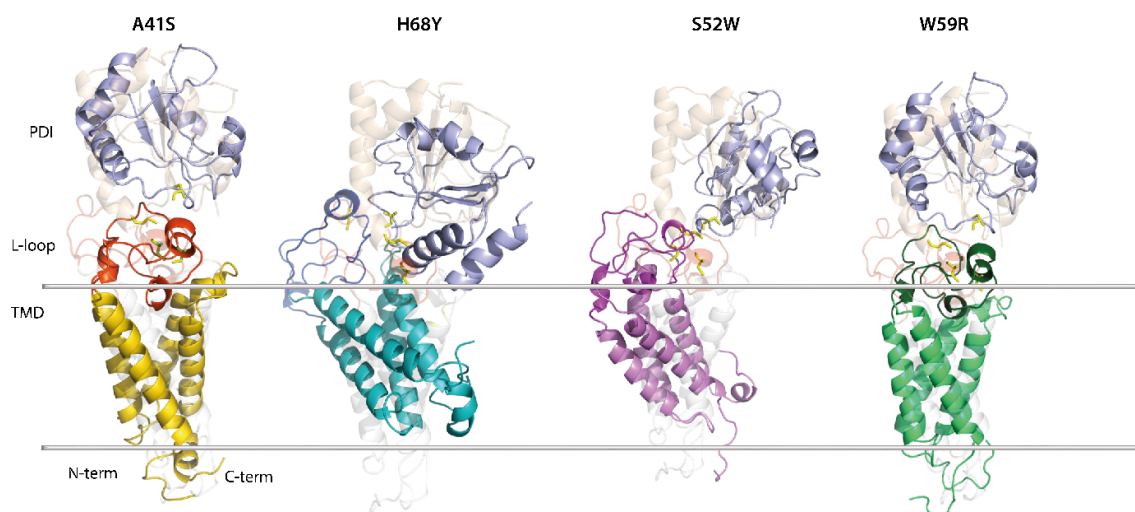

**Figure S5.** Computational protein–protein docking of PDI (ligand) onto hVKORC1 (target) performed with HADDOCK using an information-driven method. The best solution (most populated cluster C1) is shown for each hVKORC1 mutant and superimposed into the model of PDI/hVKORC1<sup>WT</sup>. Proteins are presented as a cartoon with PDI in lilac and hVKORC1 mutants are distinguished by colour. In PDI/hVKORC1<sup>A41S</sup> and PDI/hVKORC1<sup>W59R</sup> models, the TMD and L-loop of hVKORC1 are denoted in yellow and red, and green and dark green, respectively. Disulphate bonds are in sticks. A possible boundary of the membrane is shown by grey lines.

**Table S1.** Docking of PDI on hVKORC1 mutants with HADDOCK.

| Metric              | hVKORC1 <sup>A41S</sup> /PDI |            |            |             |             |             |             |             |            |
|---------------------|------------------------------|------------|------------|-------------|-------------|-------------|-------------|-------------|------------|
|                     | C1                           | C2         | C3         | C4          | C5          | C6          | C7          | C8          | C9         |
| Score <sup>i</sup>  | -72.7±7.2                    | -57.7±3.2  | -52.8±1.6  | -75.4±4.7   | -73.9± 5.3  | -63.5±4.3   | -47.5±7.3   | -64.2±3.6   | -20.7±4.2  |
| Size <sup>ii</sup>  | 35                           | 28         | 21         | 16          | 13          | 11          | 8           | 6           | 5          |
| RMSD <sup>iii</sup> | 2.3±0.8                      | 13.2±0.0   | 12.5±0.3   | 13.8±0.4    | 15.6±0.7    | 9.8±0.7     | 10.8±0.8    | 2.9±0.6     | 11.8±0.7   |
| VdW <sup>iv</sup>   | -22.4±1.5                    | -28.3±2.6  | -23.9±2.7  | -22.8±5.0   | -17.9±3.2   | -16.5±5.9   | -6.0±2.9    | -13.9±3.1   | -8.3±3.5   |
| EE <sup>v</sup>     | -195.6±31.6                  | -81.2±28.4 | -49.8±20.3 | -169.9±20.8 | -155.6±41.6 | -201.3±22.9 | -192.9±33.0 | -246.2±21.8 | -31.7±35.5 |
| DE <sup>vi</sup>    | -11.3±2.6                    | -15.9±1.3  | -19.1±1.2  | -18.7±2.5   | -25.2±3.6   | -8.8±3.5    | -3.9±2.9    | -2.3±3.7    | -9.2±2.3   |
| RVE <sup>vii</sup>  | 0.0±0.0                      | 27.2±2.5   | 0.9±0.5    | 1.3±0.8     | 3.4±2.0     | 20.0±11.6   | 10.5±11.4   | 12.2±12.2   | 32.5±3.1   |
| BSA <sup>viii</sup> | 789.6±103.1                  | 865.2±40.5 | 734.7±77.7 | 913.5±52.4  | 681.1±101.8 | 814.2±48.1  | 627.2±71.3  | 712.5±129.6 | 268.8±19.2 |
| Z-Score             | -1.0                         | -0.0       | 0.3        | -1.1        | -1.0        | -0.4        | 0.6         | -0.4        | 2.2        |
| S-S                 | 14.9                         | 13.7       | 11.0       | 11.6        | 9.8         | 10.4        | 11.5        | 16.9        | 13.4       |

Notes: <sup>i</sup>HADDOCK score; <sup>ii</sup>Cluster size; <sup>iii</sup>RMSD from the overall lowest-energy structure; <sup>iv</sup>Van der Waals energy; <sup>v</sup>Electrostatic energy; <sup>vi</sup>Desolvation energy; <sup>vii</sup>Restraints violation energy; <sup>viii</sup>Buried Surface Area; <sup>ix</sup>S-S distance (Å).
